# Supplementary material
Source: PubMed Central journal article supplement (PMC10294543)
Supplement: NIHMS1900344-supplement-Supplementary_Information.pdf [file NIHMS1900344-supplement-Supplementary_Information.pdf]

## **Supplementary Information**

Supplementary Table 1 Diseases and corresponding ICD-8 codes for the outcomes

Supplementary Table 2 Associations between cumulative average dietary patterns (comparing the 90<sup>th</sup> to 10<sup>th</sup> percentile) and major chronic disease in each cohort and random-effects meta-analysis

Supplementary Table 3 HRs (95% CI) for the associations between cumulative average dietary patterns in quintiles and major chronic disease in the pooled data

Supplementary Table 4 Associations between cumulative average dietary patterns (comparing the 90<sup>th</sup> to 10<sup>th</sup> percentile) and risk of major chronic disease in sensitivity analyses

**Supplementary Table 1 Diseases and corresponding ICD-8 codes for the outcomes**

| Outcome                           | Diseases                                                                                                                                                                                                                                                                                                                                                                                                                                                                                                                                                         |
|-----------------------------------|------------------------------------------------------------------------------------------------------------------------------------------------------------------------------------------------------------------------------------------------------------------------------------------------------------------------------------------------------------------------------------------------------------------------------------------------------------------------------------------------------------------------------------------------------------------|
| Major cardiovascular disease      | Coronary heart disease and stroke.                                                                                                                                                                                                                                                                                                                                                                                                                                                                                                                               |
| Coronary heart disease            | Fatal coronary heart disease and nonfatal myocardial infarction (ICD-8 codes 410, 412).                                                                                                                                                                                                                                                                                                                                                                                                                                                                          |
| Stroke                            | Fatal and nonfatal strokes (ICD-8 codes 430–438).                                                                                                                                                                                                                                                                                                                                                                                                                                                                                                                |
| Type 2 diabetes                   | Diabetes mellitus (ICD-8 code 250).                                                                                                                                                                                                                                                                                                                                                                                                                                                                                                                              |
| Total cancer                      | All cancer types (ICD-8 codes 140–209) except non-melanoma skin cancer and nonfatal prostate cancer.                                                                                                                                                                                                                                                                                                                                                                                                                                                             |
| Obesity-related cancer            | Cancer types that have been related to excessive body fatness with sufficient evidence, including esophagus cancer (ICD-8 code 150), gastric cancer (ICD-8 code 151), colorectal cancer (ICD-8 codes 153, 154), liver cancer (ICD-8 code 155), gallbladder cancer (ICD-8 code 156), pancreatic cancer (ICD-8 code 157), postmenopausal breast cancer (ICD-8 code 174), endometrial cancer (ICD-8 code 182), ovarian cancer (ICD-8 code 183), kidney cancer (ICD-8 code 189), thyroid cancer (ICD-8 code 193), and multiple myeloma (ICD-8 code 203).             |
| Smoking-related cancer            | Cancer types that have been related to tobacco smoking with sufficient evidence, including oral cancer (ICD-8 codes 140–149), esophageal cancer (ICD-8 code 150), stomach cancer (ICD-8 code 151), colorectal cancer (ICD-8 codes 153, 154), liver cancer (ICD-8 code 155), pancreatic cancer (ICD-8 code 157), nasopharyngeal cancer (ICD-8 code 147), lung cancer (ICD-8 code 162), cervical cancer (ICD-8 code 180), ovarian cancer (ICD-8 code 183), bladder cancer (ICD-8 code 188), kidney cancer (ICD-8 code 189), and myeloid leukemia (ICD-8 code 205). |
| Alternative major chronic disease | Incidence of major chronic disease and non-traumatic death. Non-traumatic death included all causes of death except those from injury (ICD-8 codes E800–E949, E960–E999) or suicides (ICD-8 codes E950–E959).                                                                                                                                                                                                                                                                                                                                                    |

**Supplementary Table 2 Associations between cumulative average dietary patterns (comparing the 90<sup>th</sup> to 10<sup>th</sup> percentile) and major chronic disease in each cohort and random-effects meta-analysis**

| Cohort      |       | HPFS <sup>a</sup> | NHS <sup>a</sup>  | NHSII <sup>a</sup> | Random-effects meta-analysis |                                                |
|-------------|-------|-------------------|-------------------|--------------------|------------------------------|------------------------------------------------|
| Cases       |       | 14,427            | 21,003            | 9,545              | 44,975                       |                                                |
| Person-year |       | 879,987           | 1,769,776         | 2,203,131          | 4,852,894                    |                                                |
| Pattern     | Model | HR (95% CI)       | HR (95% CI)       | HR (95% CI)        | HR (95% CI)                  | <i>P</i> <sub>Heterogeneity</sub> <sup>b</sup> |
| AHEI-2010   | Age   | 0.74 (0.71, 0.77) | 0.64 (0.62, 0.66) | 0.51 (0.49, 0.54)  | 0.62 (0.52, 0.75)            | <0.0001                                        |
|             | MV    | 0.84 (0.81, 0.88) | 0.77 (0.74, 0.80) | 0.63 (0.59, 0.67)  | 0.74 (0.64, 0.86)            | <0.0001                                        |
| AMED        | Age   | 0.72 (0.69, 0.76) | 0.67 (0.64, 0.69) | 0.54 (0.51, 0.56)  | 0.64 (0.55, 0.75)            | <0.0001                                        |
|             | MV    | 0.83 (0.79, 0.87) | 0.83 (0.80, 0.87) | 0.67 (0.63, 0.71)  | 0.77 (0.68, 0.88)            | <0.0001                                        |
| hPDI        | Age   | 0.79 (0.75, 0.82) | 0.71 (0.68, 0.73) | 0.58 (0.55, 0.62)  | 0.69 (0.59, 0.80)            | <0.0001                                        |
|             | MV    | 0.86 (0.82, 0.90) | 0.81 (0.78, 0.84) | 0.70 (0.67, 0.75)  | 0.79 (0.71, 0.88)            | <0.0001                                        |
| DASH        | Age   | 0.71 (0.68, 0.75) | 0.64 (0.62, 0.67) | 0.48 (0.46, 0.51)  | 0.61 (0.50, 0.74)            | <0.0001                                        |
|             | MV    | 0.83 (0.79, 0.87) | 0.84 (0.81, 0.88) | 0.64 (0.60, 0.67)  | 0.76 (0.65, 0.90)            | <0.0001                                        |
| DRRD        | Age   | 0.74 (0.71, 0.77) | 0.60 (0.58, 0.63) | 0.46 (0.44, 0.49)  | 0.59 (0.46, 0.75)            | <0.0001                                        |
|             | MV    | 0.82 (0.78, 0.85) | 0.71 (0.68, 0.73) | 0.58 (0.55, 0.62)  | 0.70 (0.59, 0.83)            | <0.0001                                        |
| WCRF/AICR   | Age   | 0.82 (0.79, 0.86) | 0.83 (0.80, 0.86) | 0.87 (0.83, 0.92)  | 0.84 (0.81, 0.87)            | 0.19                                           |
|             | MV    | 0.95 (0.91, 0.99) | 1.02 (0.98, 1.06) | 1.06 (1.00, 1.12)  | 1.01 (0.95, 1.07)            | 0.005                                          |
| rEDIH       | Age   | 0.68 (0.66, 0.71) | 0.54 (0.52, 0.56) | 0.35 (0.33, 0.37)  | 0.51 (0.36, 0.71)            | <0.0001                                        |
|             | MV    | 0.74 (0.70, 0.77) | 0.60 (0.58, 0.62) | 0.41 (0.39, 0.43)  | 0.56 (0.42, 0.76)            | <0.0001                                        |
| rEDIP       | Age   | 0.77 (0.74, 0.80) | 0.57 (0.55, 0.59) | 0.40 (0.38, 0.42)  | 0.56 (0.40, 0.78)            | <0.0001                                        |
|             | MV    | 0.77 (0.74, 0.80) | 0.60 (0.58, 0.62) | 0.45 (0.43, 0.47)  | 0.59 (0.45, 0.78)            | <0.0001                                        |

AHEI-2010, Alternative Healthy Eating Index-2010; AMED, Alternate Mediterranean Diet score; CI, Confidence interval; DASH, Dietary Approaches to Stop Hypertension score; DRRD, Diabetes Risk Reduction Diet; hPDI, Healthful plant-based diet index; HR, Hazard ratio; rEDIH, reversed Empirical dietary index for hyperinsulinemia; MV, multivariable rEDIP, reversed Empirical dietary inflammation pattern; WCRF/AICR, World Cancer Research Fund/American Institute for Cancer Research (WCRF/AICR) dietary score.

MV model: adjusted for family history of diabetes (yes or no), family history of cancer (yes or no), family history of cardiovascular disease (yes or no), physical activity (<3.0, 3.0-8.9, 9.0-17.9, 18.0-26.9, 27.0-41.9, or ≥42 MET-h/week), cigarette smoking status (never, former quitting ≥10 y, former quitting <10 y, current), cigarette smoking pack-years (0, 1-4, 5-14, 15-24, or ≥25 pack-years), multivitamin use (yes or no), regular aspirin use (yes or no), regular non-steroidal anti-inflammatory drugs use (yes or no), postmenopausal hormone use (premenopausal, never, former, or current use) for women, and total energy intake (quintiles). For DASH, hPDI, and DRRD, alcohol consumption (<5.0, 5.0-14.9, or ≥15.0 g/d) was additionally adjusted for. We reported unadjusted *P* values based on two-sided statistical tests.

<sup>a</sup>Cohort-specific analyses were stratified by age (in month) and calendar year.

<sup>b</sup>*P*-value for the heterogeneity test based on *Q* statistic.

**Supplementary Table 3 HRs (95% CI) for the associations between cumulative average dietary patterns in quintiles and major chronic disease in the pooled data**

| Pattern <sup>a</sup> | Quintile    | Q1 (Ref.) | Q2                | Q3                | Q4                | Q5                | Continuous <sup>b</sup> |
|----------------------|-------------|-----------|-------------------|-------------------|-------------------|-------------------|-------------------------|
| AHEI-2010            | Cases       | 9,630     | 9,724             | 9,266             | 8,695             | 7,660             | 44,975                  |
|                      | Person-year | 972,731   | 971,991           | 971,203           | 969,728           | 967,242           | 4,852,894               |
|                      | Age         | 1         | 0.91 (0.88, 0.94) | 0.82 (0.80, 0.85) | 0.74 (0.72, 0.76) | 0.63 (0.61, 0.65) | 0.64 (0.62, 0.66)       |
|                      | MV          | 1         | 0.96 (0.93, 0.99) | 0.90 (0.87, 0.93) | 0.85 (0.82, 0.87) | 0.76 (0.73, 0.78) | 0.76 (0.74, 0.78)       |
| AMED                 | Cases       | 9,826     | 9,575             | 9,297             | 8,652             | 7,625             | 44,975                  |
|                      | Person-year | 968,590   | 969,696           | 970,851           | 971,348           | 972,409           | 4,852,894               |
|                      | Age         | 1         | 0.88 (0.86, 0.91) | 0.82 (0.80, 0.84) | 0.74 (0.71, 0.76) | 0.63 (0.62, 0.65) | 0.65 (0.64, 0.67)       |
|                      | MV          | 1         | 0.94 (0.92, 0.97) | 0.91 (0.89, 0.94) | 0.85 (0.83, 0.88) | 0.78 (0.75, 0.80) | 0.79 (0.77, 0.81)       |
| hPDI                 | Cases       | 9,369     | 9,428             | 9,268             | 8,847             | 8,063             | 44,975                  |
|                      | Person-year | 968,809   | 969,693           | 970,720           | 971,596           | 972,078           | 4,852,894               |
|                      | Age         | 1         | 0.91 (0.89, 0.94) | 0.85 (0.83, 0.88) | 0.78 (0.76, 0.80) | 0.68 (0.66, 0.71) | 0.70 (0.69, 0.72)       |
|                      | MV          | 1         | 0.95 (0.92, 0.97) | 0.91 (0.88, 0.94) | 0.86 (0.83, 0.88) | 0.79 (0.76, 0.81) | 0.80 (0.78, 0.82)       |
| DASH                 | Cases       | 9,906     | 9,406             | 9,168             | 8,638             | 7,857             | 44,975                  |
|                      | Person-year | 969,139   | 969,686           | 970,499           | 971,429           | 972,141           | 4,852,894               |
|                      | Age         | 1         | 0.85 (0.83, 0.88) | 0.78 (0.76, 0.80) | 0.70 (0.68, 0.72) | 0.61 (0.59, 0.62) | 0.63 (0.61, 0.64)       |
|                      | MV          | 1         | 0.93 (0.90, 0.95) | 0.89 (0.86, 0.92) | 0.83 (0.81, 0.86) | 0.76 (0.74, 0.79) | 0.78 (0.76, 0.80)       |
| DRRD                 | Cases       | 10,206    | 9,691             | 9,052             | 8,563             | 7,463             | 44,975                  |
|                      | Person-year | 969,186   | 969,360           | 970,592           | 970,937           | 972,819           | 4,852,894               |
|                      | Age         | 1         | 0.85 (0.83, 0.88) | 0.76 (0.74, 0.79) | 0.69 (0.67, 0.71) | 0.58 (0.56, 0.60) | 0.61 (0.59, 0.62)       |
|                      | MV          | 1         | 0.89 (0.86, 0.91) | 0.82 (0.80, 0.85) | 0.78 (0.75, 0.80) | 0.68 (0.66, 0.70) | 0.70 (0.69, 0.72)       |
| WCRF/AICR            | Cases       | 8,240     | 9,137             | 9,237             | 9,520             | 8,841             | 44,975                  |
|                      | Person-year | 971,959   | 970,728           | 970,471           | 969,576           | 970,161           | 4,852,894               |
|                      | Age         | 1         | 1.00 (0.97, 1.03) | 0.95 (0.92, 0.98) | 0.94 (0.91, 0.96) | 0.83 (0.80, 0.85) | 0.84 (0.82, 0.86)       |
|                      | MV          | 1         | 1.05 (1.01, 1.08) | 1.04 (1.01, 1.07) | 1.06 (1.03, 1.10) | 1.00 (0.97, 1.04) | 1.00 (0.98, 1.03)       |
| rEDIH                | Cases       | 11,033    | 9,907             | 8,946             | 7,979             | 7,110             | 44,975                  |
|                      | Person-year | 970,153   | 970,728           | 971,201           | 970,746           | 970,067           | 4,852,894               |
|                      | Age         | 1         | 0.78 (0.76, 0.80) | 0.66 (0.64, 0.67) | 0.56 (0.54, 0.57) | 0.49 (0.48, 0.51) | 0.53 (0.52, 0.54)       |
|                      | MV          | 1         | 0.82 (0.80, 0.84) | 0.70 (0.68, 0.72) | 0.61 (0.59, 0.63) | 0.55 (0.53, 0.56) | 0.58 (0.57, 0.60)       |
| rEDIP                | Cases       | 11,739    | 9,995             | 8,766             | 7,785             | 6,690             | 44,975                  |
|                      | Person-year | 969,472   | 970,510           | 970,829           | 970,901           | 971,184           | 4,852,894               |
|                      | Age         | 1         | 0.78 (0.76, 0.81) | 0.68 (0.66, 0.70) | 0.60 (0.58, 0.62) | 0.54 (0.52, 0.55) | 0.59 (0.57, 0.60)       |
|                      | MV          | 1         | 0.82 (0.80, 0.84) | 0.71 (0.69, 0.73) | 0.63 (0.61, 0.65) | 0.56 (0.54, 0.58) | 0.61 (0.60, 0.63)       |

AHEI-2010, Alternative Healthy Eating Index-2010; AMED, Alternate Mediterranean Diet score; CI, Confidence interval; DASH, Dietary Approaches to Stop Hypertension score; DRRD, Diabetes Risk Reduction Diet; hPDI, Healthful plant-based diet index; HR, Hazard ratio; MV, multivariable; rEDIH, reversed Empirical dietary index for hyperinsulinemia; rEDIP, reversed Empirical dietary inflammation pattern; Ref, reference; WCRF/AICR, World Cancer Research Fund/American Institute for Cancer Research (WCRF/AICR) dietary score.

Analyses were stratified by age (in month), calendar year, and cohort. MV model: adjusted for family history of diabetes (yes or no), family history of cancer (yes or no), family history of cardiovascular disease (yes or no), physical activity (<3.0, 3.0-8.9, 9.0-17.9, 18.0-26.9, 27.0-41.9, or >=42 MET-h/week), cigarette smoking status (never, former quitting >=10 y, former quitting <10 y, current), cigarette smoking pack-years (0, 1-4, 5-14, 15-24, or >=25 pack-years), multivitamin use (yes or no), regular aspirin use (yes or no), regular non-steroidal anti-inflammatory drugs use (yes or no), postmenopausal hormone use (premenopausal, never, former, or current use) for women, and total energy intake (quintiles). For DASH, hPDI, and DRRD, alcohol consumption (<5.0, 5.0-14.9, or >=15.0 g/d) was additionally adjusted for.

<sup>a</sup>Linear trend was tested using the median score of each quintile as a continuous variable. *P* values based on the two-sided test for all patterns were <0.0001 except WCRF/AICR in the MV model (*P* = 0.81) (not adjusted for multiple comparisons). <sup>b</sup>Comparing the 90<sup>th</sup> to 10<sup>th</sup> percentile.

**Supplementary Table 4 Associations between cumulative average dietary patterns (comparing the 90<sup>th</sup> to 10<sup>th</sup> percentile) and risk of major chronic disease in sensitivity analyses**

| Cases       |       | Censoring loss to follow-up |                | Stop updating when intermediate endpoints occurred |                |
|-------------|-------|-----------------------------|----------------|----------------------------------------------------|----------------|
| Person-year |       | 37,148                      |                | 44,975                                             |                |
| 4,482,907   |       |                             |                | 4,852,894                                          |                |
| Pattern     | Model | HR (95% CI)                 | P <sup>a</sup> | HR (95% CI)                                        | P <sup>a</sup> |
| AHEI-2010   | Age   | 0.63 (0.61, 0.64)           | <0.0001        | 0.64 (0.62, 0.66)                                  | <0.0001        |
|             | MV    | 0.74 (0.72, 0.76)           | <0.0001        | 0.75 (0.73, 0.77)                                  | <0.0001        |
| AMED        | Age   | 0.66 (0.64, 0.67)           | <0.0001        | 0.71 (0.69, 0.73)                                  | <0.0001        |
|             | MV    | 0.79 (0.77, 0.81)           | <0.0001        | 0.85 (0.83, 0.87)                                  | <0.0001        |
| hPDI        | Age   | 0.70 (0.68, 0.72)           | <0.0001        | 0.75 (0.73, 0.77)                                  | <0.0001        |
|             | MV    | 0.79 (0.77, 0.81)           | <0.0001        | 0.84 (0.82, 0.86)                                  | <0.0001        |
| DASH        | Age   | 0.62 (0.61, 0.64)           | <0.0001        | 0.65 (0.64, 0.67)                                  | <0.0001        |
|             | MV    | 0.76 (0.74, 0.79)           | <0.0001        | 0.81 (0.79, 0.83)                                  | <0.0001        |
| DRRD        | Age   | 0.60 (0.58, 0.61)           | <0.0001        | 0.67 (0.65, 0.68)                                  | <0.0001        |
|             | MV    | 0.69 (0.67, 0.71)           | <0.0001        | 0.77 (0.75, 0.79)                                  | <0.0001        |
| WCRF/AICR   | Age   | 0.85 (0.83, 0.88)           | <0.0001        | 0.83 (0.81, 0.85)                                  | <0.0001        |
|             | MV    | 1.01 (0.98, 1.04)           | 0.53           | 0.97 (0.95, 0.99)                                  | 0.02           |
| rEDIH       | Age   | 0.49 (0.47, 0.50)           | <0.0001        | 0.56 (0.55, 0.58)                                  | <0.0001        |
|             | MV    | 0.54 (0.53, 0.56)           | <0.0001        | 0.62 (0.60, 0.63)                                  | <0.0001        |
| rEDIP       | Age   | 0.55 (0.53, 0.56)           | <0.0001        | 0.67 (0.66, 0.69)                                  | <0.0001        |
|             | MV    | 0.58 (0.56, 0.59)           | <0.0001        | 0.69 (0.68, 0.71)                                  | <0.0001        |

AHEI-2010, Alternative Healthy Eating Index-2010; AMED, Alternate Mediterranean Diet score; BMI, body mass index; CI, Confidence interval; DASH, Dietary Approaches to Stop Hypertension score; DRRD, Diabetes Risk Reduction Diet; hPDI, Healthful plant-based diet index; HR, Hazard ratio; MV, multivariable; rEDIH, reversed Empirical dietary index for hyperinsulinemia; rEDIP, reversed Empirical dietary inflammation pattern; WCRF/AICR, World Cancer Research Fund/American Institute for Cancer Research (WCRF/AICR) dietary score.

Analyses were stratified by age (in month), calendar year, and cohort. MV model: adjusted for family history of diabetes (yes or no), family history of cancer (yes or no), family history of cardiovascular disease (yes or no), physical activity (<3.0, 3.0-8.9, 9.0-17.9, 18.0-26.9, 27.0-41.9, or ≥42 MET-h/week), cigarette smoking status (never, former quitting ≥10 y, former quitting <10 y, current), cigarette smoking pack-years (0, 1-4, 5-14, 15-24, or ≥25 pack-years), multivitamin use (yes or no), regular aspirin use (yes or no), regular non-steroidal anti-inflammatory drugs use (yes or no), postmenopausal hormone use (premenopausal, never, former, or current use) for women, and total energy intake (quintiles). For DASH, hPDI, and DRRD, alcohol consumption (<5.0, 5.0-14.9, or ≥15.0 g/d) was additionally adjusted for.

<sup>a</sup>P-value for the two-sided Wald test (not adjusted for multiple comparisons).
